# Supplementary figures and images for: Construction of an Excellent 7 mRNAsi-Related Gene Model Based on Cancer Stem Cells for Predicting Survival Outcome of Cervical Cancer
Source: Hindawi journal article supplement (doi:10.1155/2023/8383058), 2023-04-26

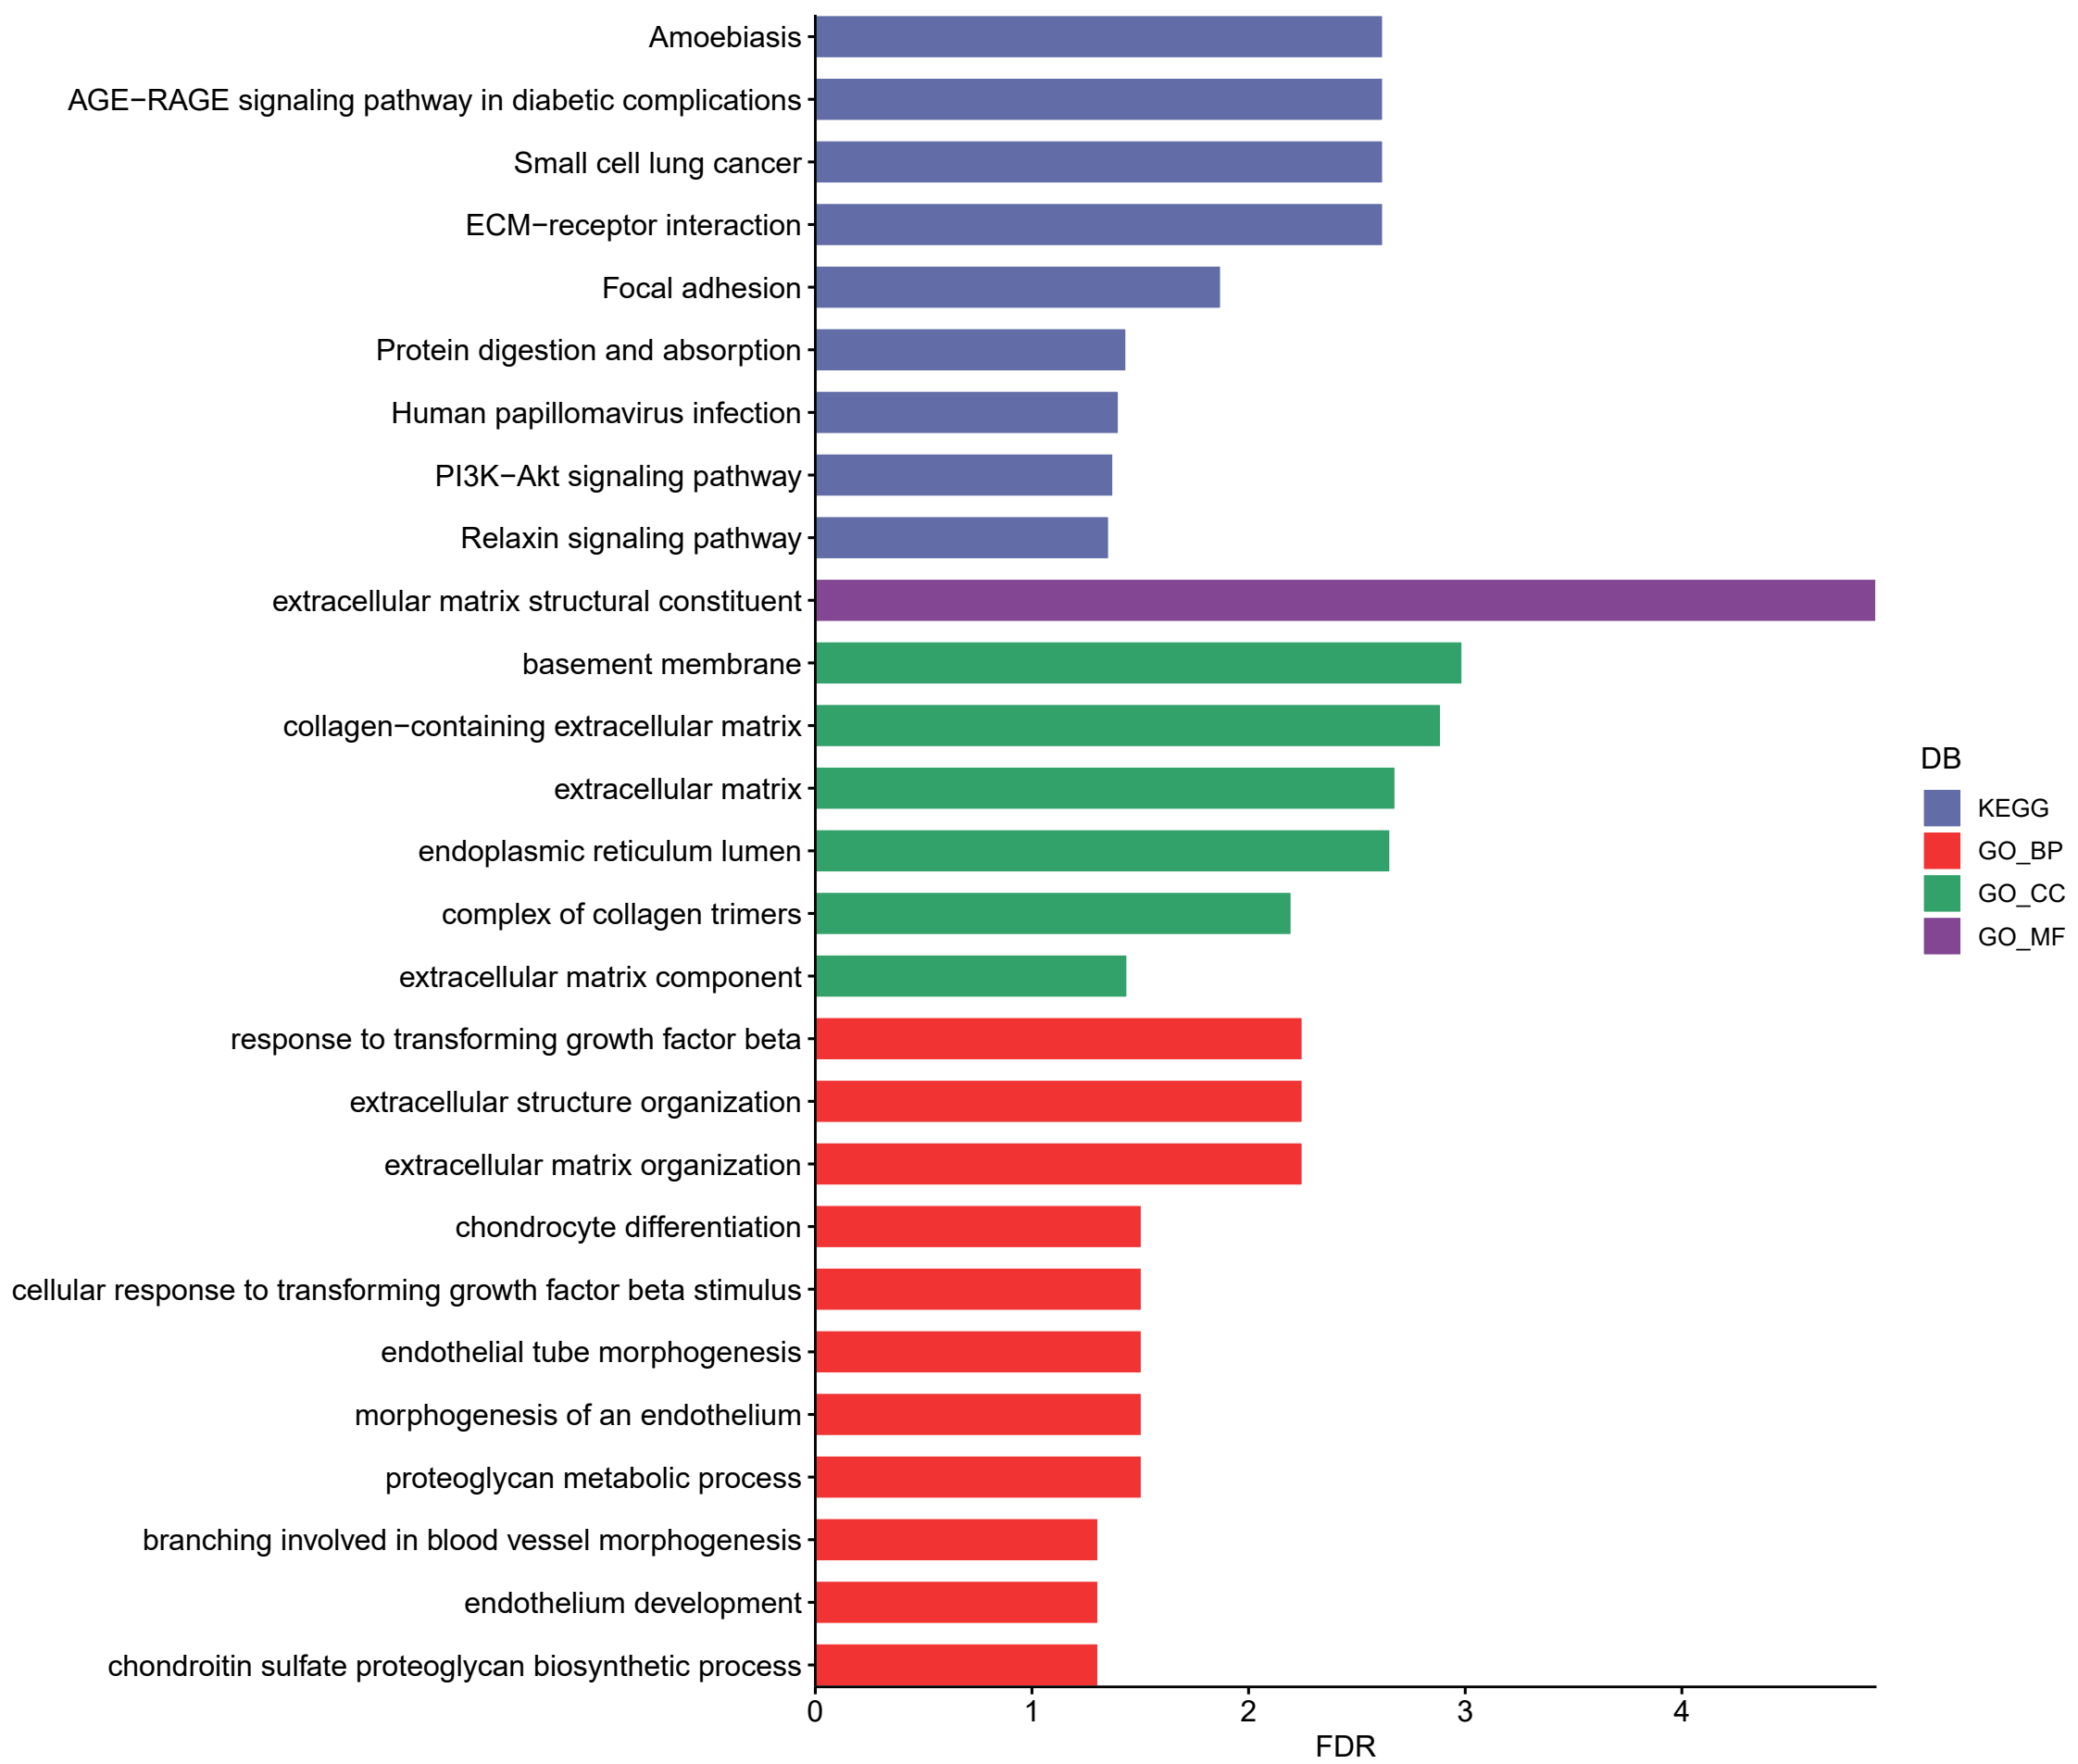

Supplement: f1 [file 8383058.f1.pdf]

**A****consensus CDF**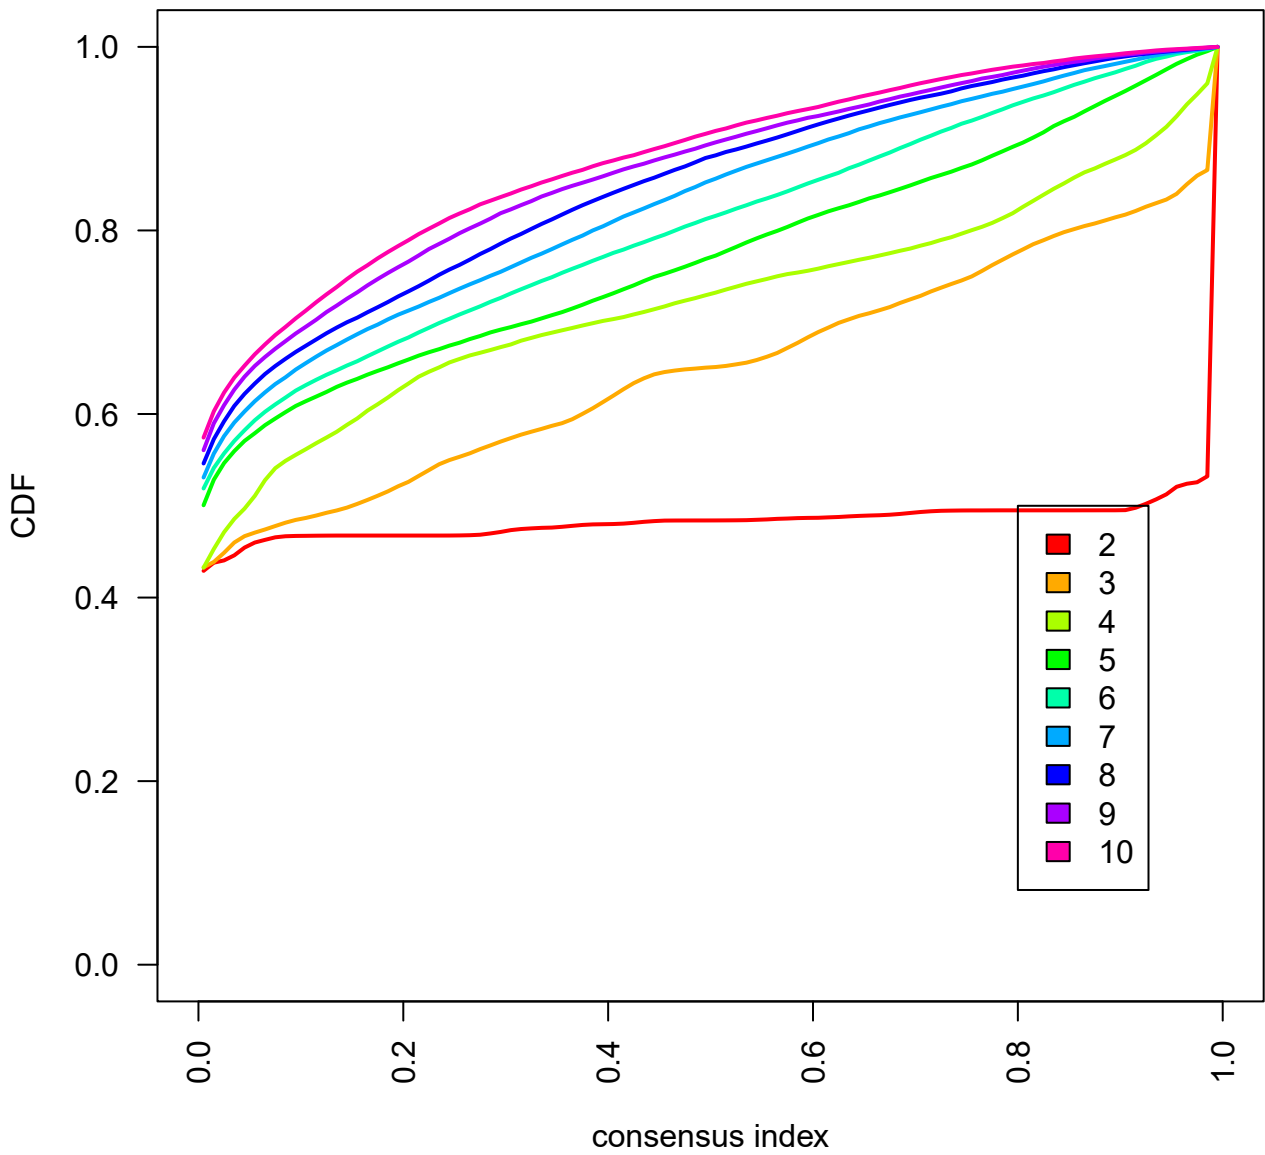**B****Delta area**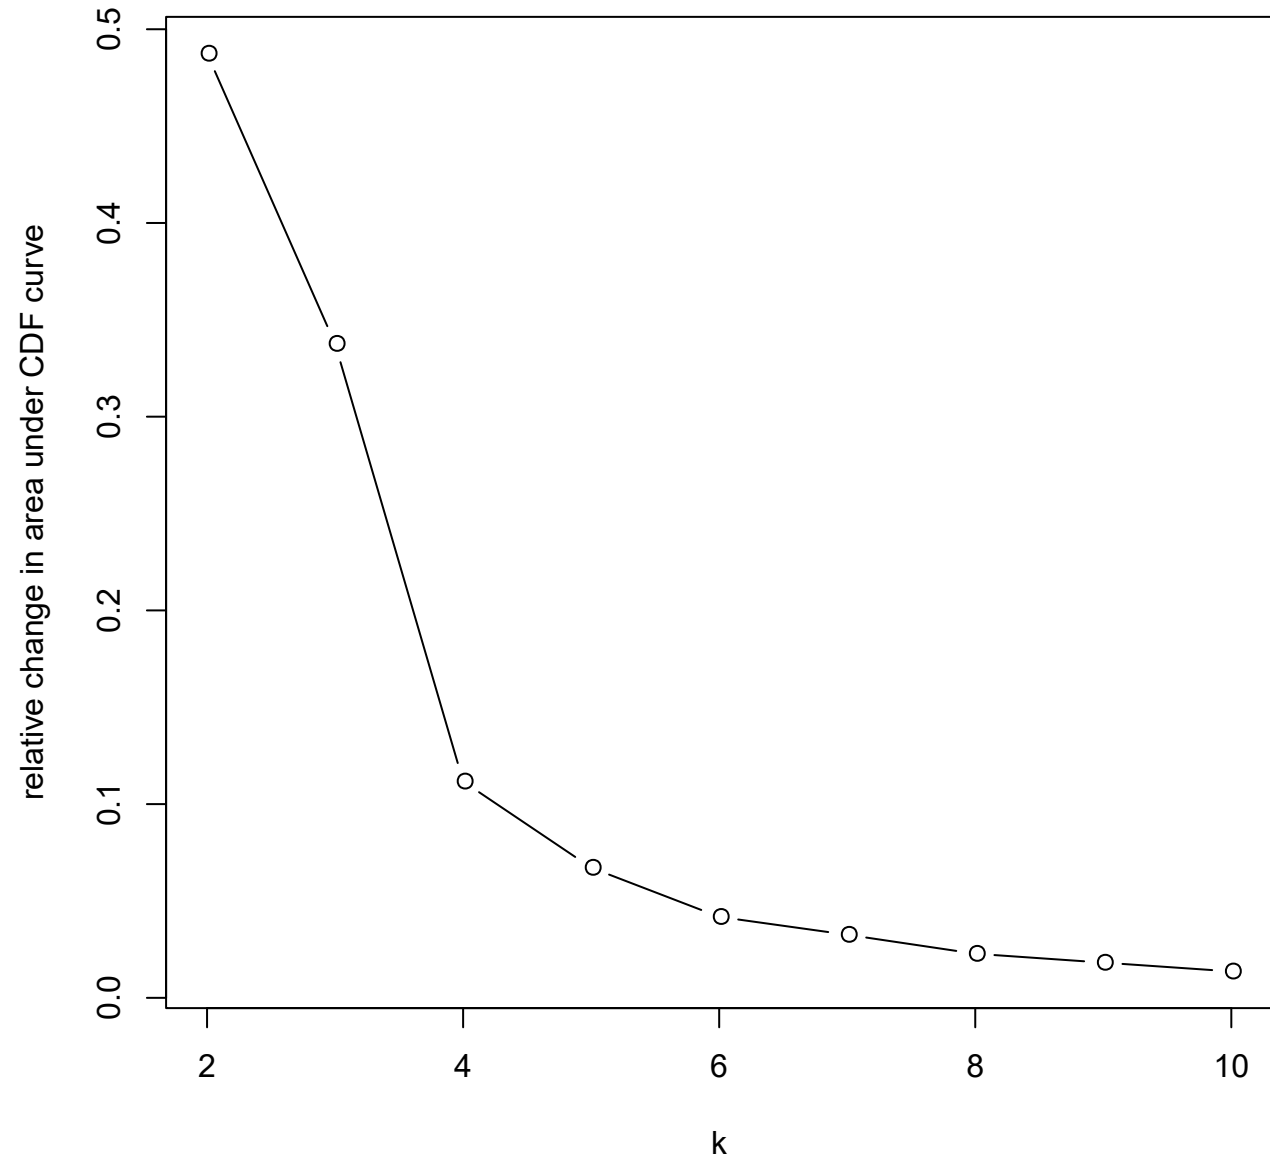

Supplement: f2 [file 8383058.f2.pdf]
